# Supplementary material
Source: publisher site journal article supplement (https://www.dovepress.com/article/397297)
Supplement: Supplementary file 1 [file get_supplementary_file.php]

**Cellular Uptake of Differently Charged Mesoporous Bioactive Glass Nanoparticles to Enable Intracellular Delivery of Therapeutic Agents**

Negar Hassani Besheli1, Juul Verbakel1, Maryam Hosseini1, Lea Andrée1, Ben Joosten2, X. Frank Walboomers1, Alessandra Cambi2, Fang Yang1, Sander C. G. Leeuwenburgh1

1 Department of Dentistry – Regenerative Biomaterials, Radboud Institute for Molecular Life Sciences, Radboudumc, Philips van Leydenlaan 25, 6525 EX Nijmegen, The Netherlands

2 Department of Cell Biology, Radboud Institute for Molecular Life Sciences, Radboud University Medical Center, Geert Grooteplein Zuid 26-28, 6525 GA Nijmegen, The Netherlands

**Table S 1** Chemical composition of ALF.

| Reagent | | Concentration (g/L) |
| --- | --- | --- |
| Magnesium chloride (MgCl2) | 0.050 | |
| Sodium chloride (NaCl) | 3.210 | |
| Disodium hydrogen phosphate (Na2HPO4) | 0.071 | |
| Sodium sulfate (Na2SO4) | 0.039 | |
| Calcium chloride dihydrate (CaCl2·2H2O) | 0.128 | |
| Sodium citrate dihydrate (C6H5Na3O7·2H2O) | 0.077 | |
| Sodium hydroxide (NaOH) | 6.000 | |
| Citric acid (C6H8O7) | 20.800 | |
| Glycine (H2NCH2­COOH) | 0.059 | |
| Sodium tartrate dihydrate (C4H4O6Na2·2H2O) | 0.090 | |
| Sodium lactate (C3H5NaO3) | 0.085 | |
| Sodium pyruvate (C3H3O3Na) | 0.086 | |

**Note**: Reprinted from *Acta Biomater*, 66, Naruphontjirakul P, Porter AE, Jones JR. In vitro osteogenesis by intracellular uptake of strontium containing bioactive glass nanoparticles. 67–80, Copyright 2018, with permission from Elsevier.31

**Supplemental Figures**


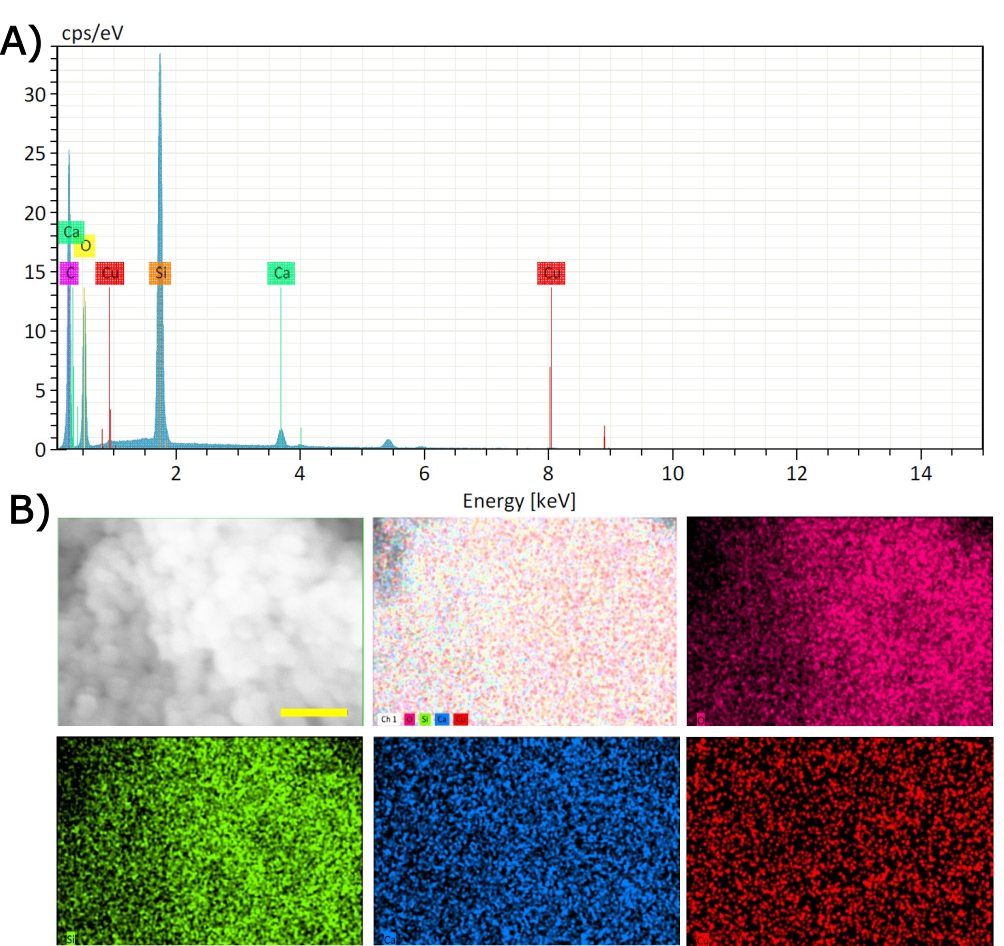


**Figure S 1** (A) Representative EDX spectrum and (B) elemental distribution of synthesized Cu-MBGNs displaying the presence of Si, Ca, and Cu.


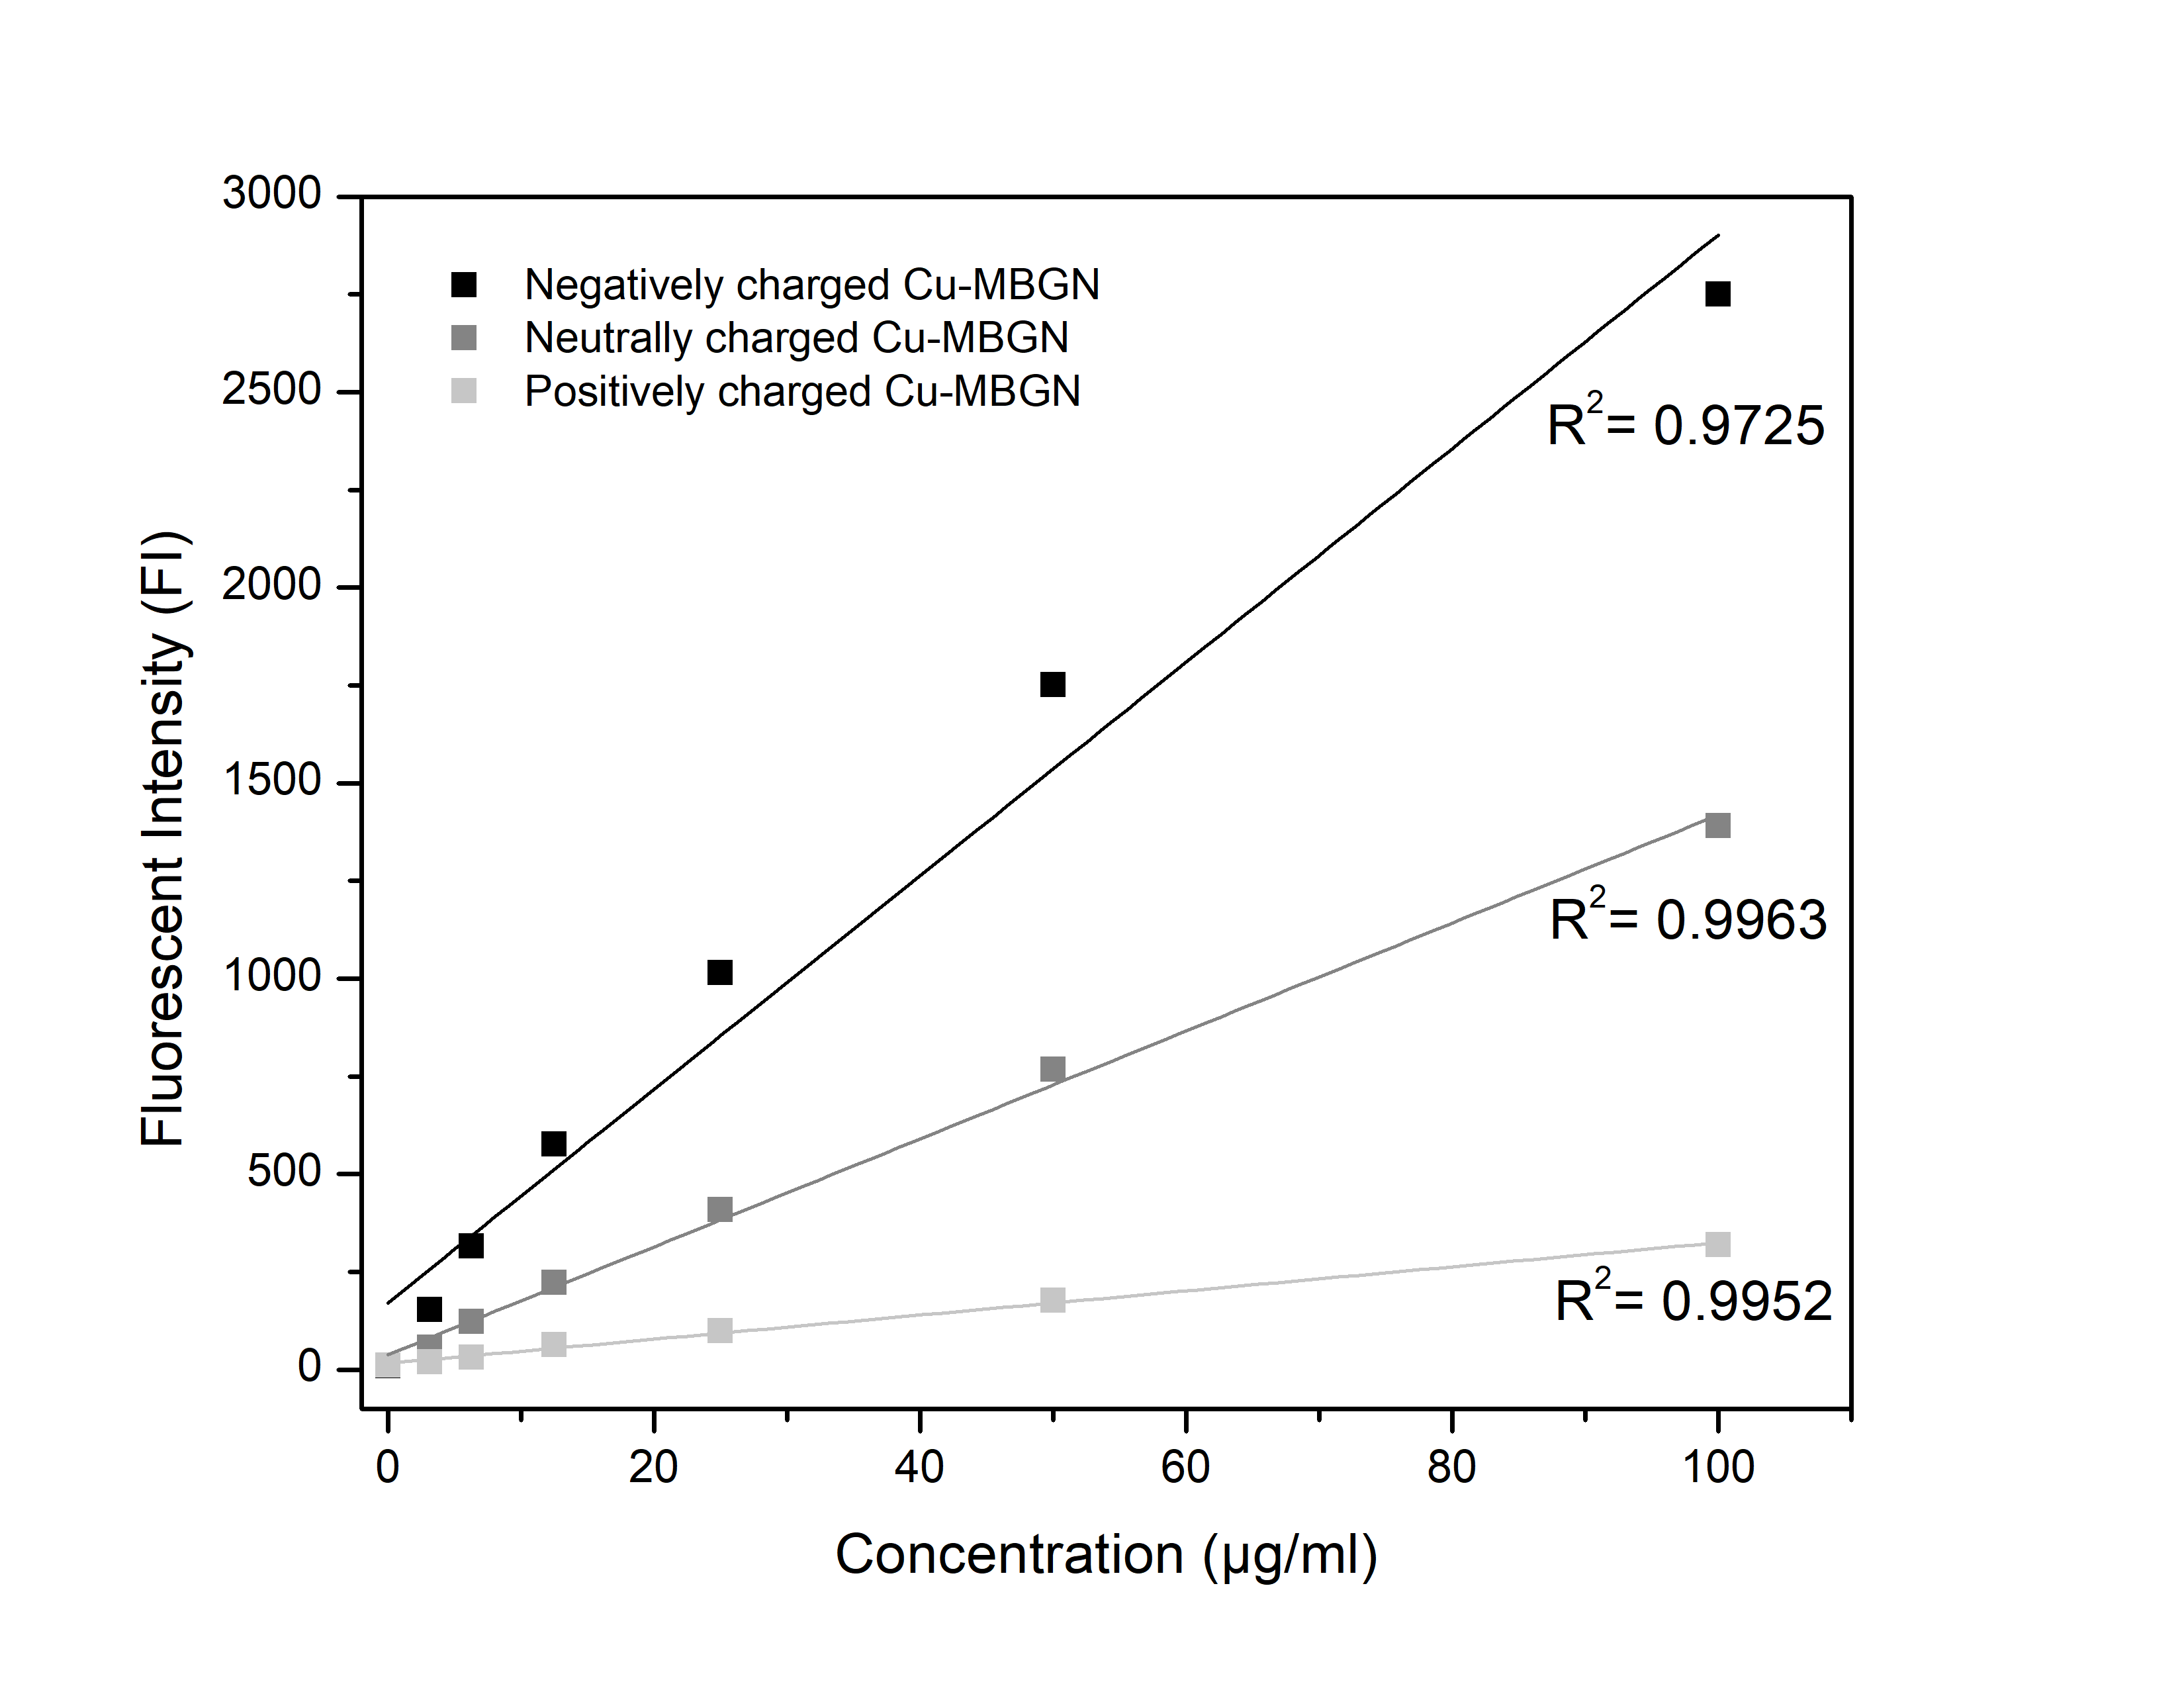


**Figure S 2** Linear relationship between fluorescence intensity and concentration of differently charged Cu-MBGNs.


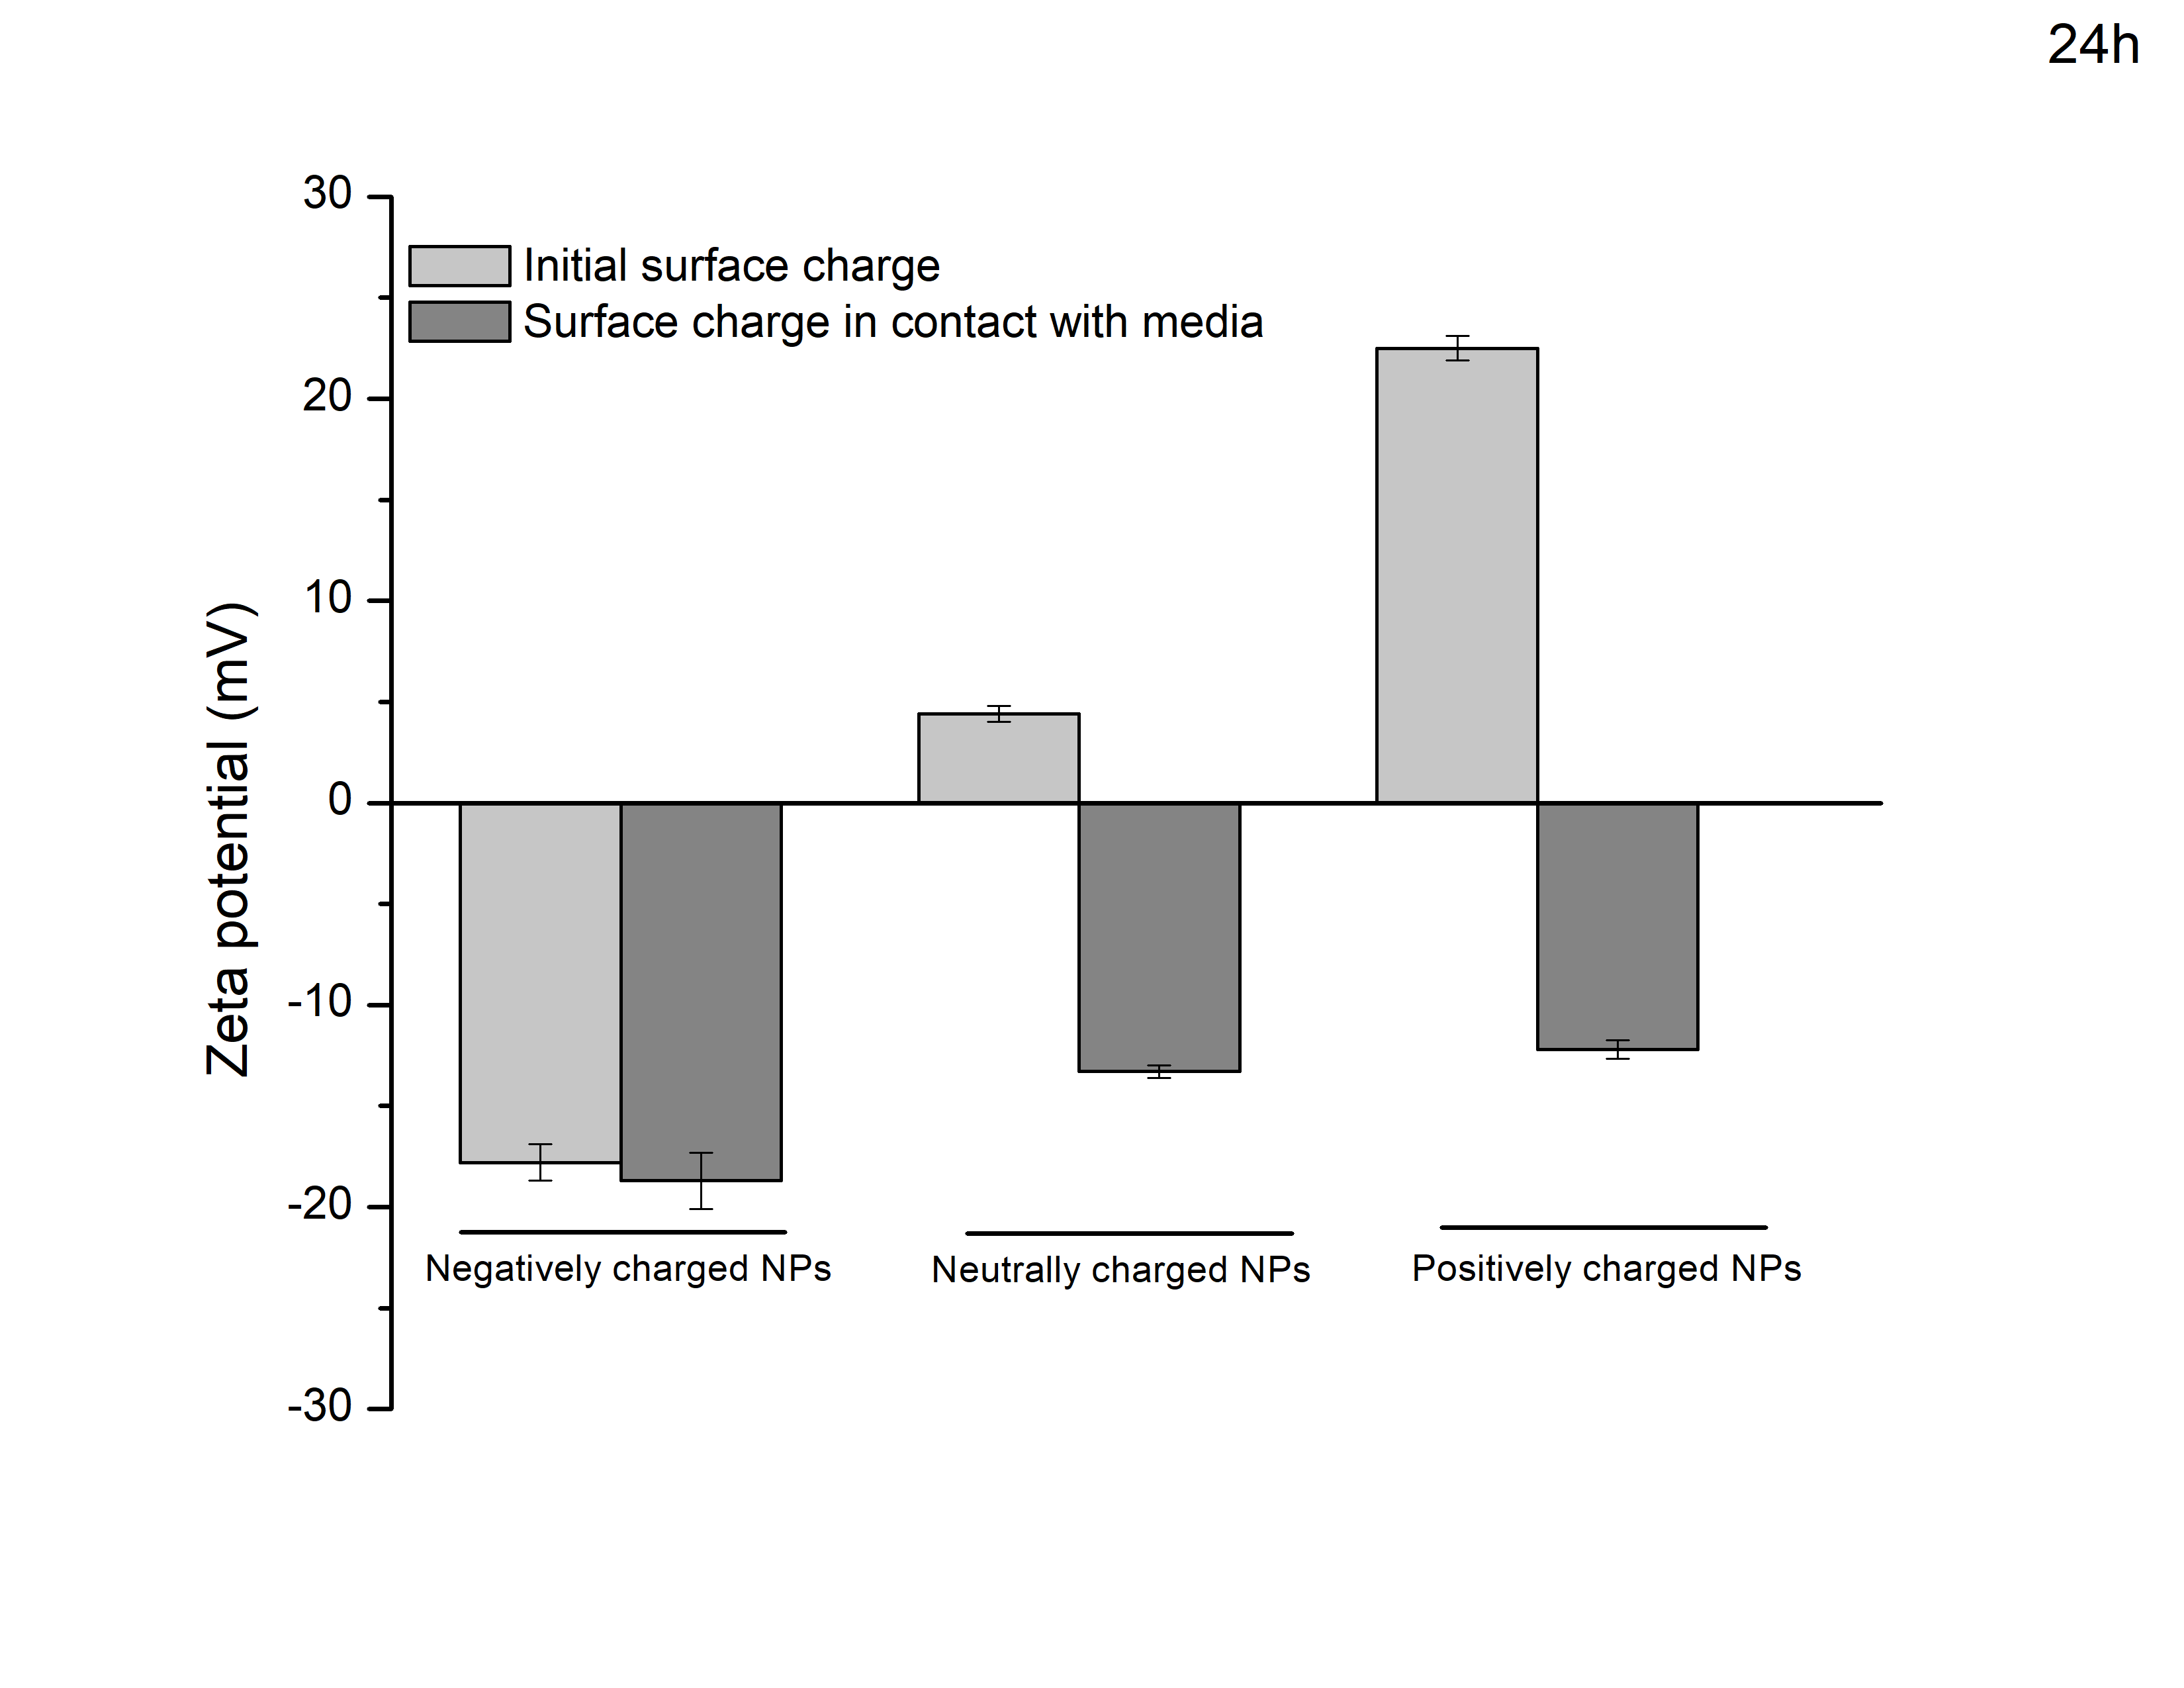


**Figure S 3** Zeta potential measurement of the nanoparticles after 24 h of incubation in media containing FBS.


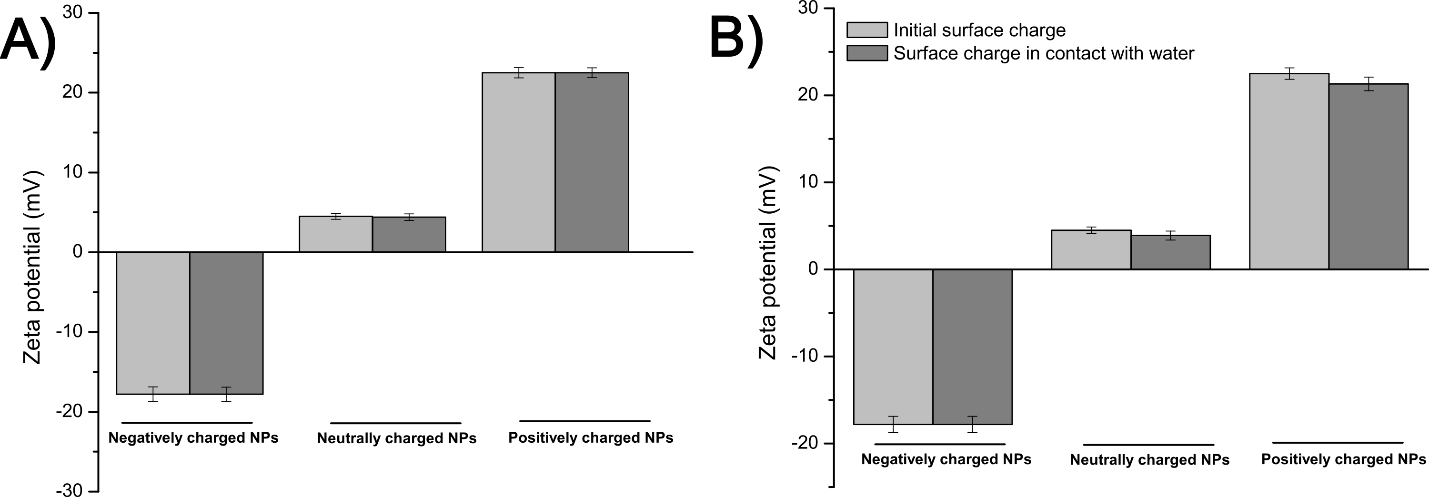


**Figure S 4** Zeta potential measurement of the nanoparticles after (A) 4 h and (B) 24h of incubation in water.

**Supplemental movies**

**Movie S1** Confocal Z-stack movie of internalized negatively charged Cu-MBGNs into MC3T3-E1 cells.

**Movie S2** Confocal Z-stack movie of internalized neutrally charged Cu-MBGNs into MC3T3-E1 cells.

**Movie S3** Confocal Z-stack movie of internalized positvely charged Cu-MBGNs into MC3T3-E1 cells.

**Movie S4** Confocal Z-stack movie of internalized negatively charged Cu-MBGNs into RAW 264.7 cells

**Movie S5** Confocal Z-stack movie of internalized neutrally charged Cu-MBGNs into RAW 264.7 cells.

**Movie S6** Confocal Z-stack movie of internalized positvely charged Cu-MBGNs into RAW 264.7 cells.
